# 1 **High-quality rice RNA-seq-based co-expression network for** 2 **predicting gene function and regulation**

3 Hua Yu<sup>a,b\*</sup>, Bingke Jiao<sup>a,b</sup>, Chengzhi Liang<sup>a,b\*</sup>

4 <sup>a</sup> State Key Laboratory of Plant Genomics, Institute of Genetic and Developmental Biology, Chinese Academy of  
5 Sciences

6 <sup>b</sup> University of Chinese Academy of Sciences, Beijing 100039, China

7 \* Corresponding author: Hua Yu, huayu@genetics.ac.cn; Chengzhi Liang, cliang@genetics.ac.cn

## 8 9 **Abstract**

10 Inferring the genome-scale gene co-expression network is important for understanding  
11 genetic architecture underlying the complex and various biological phenotypes. The  
12 recent availability of large-scale RNA-seq sequencing data provides great potential for  
13 co-expression network inference. In this study, for the first time, we presented a novel  
14 heterogeneous ensemble pipeline integrating three frequently used inference methods,  
15 to build a high-quality RNA-seq-based Gene Co-expression Network (GCN) in rice,  
16 an important monocot species. The quality of the network obtained by our proposed  
17 method was first evaluated and verified with the curated positive and negative gene  
18 functional link datasets, which obviously outperformed each single method. Secondly,  
19 the powerful capability of this network for associating unknown genes with biological  
20 functions and agronomic traits was showed by enrichment analysis and case studies.  
21 Particularly, we demonstrated the potential applications of our proposed method to  
22 predict the biological roles of long non-coding RNA (lncRNA) and circular RNA  
23 (circRNA) genes. Our results provided a valuable data source for selecting candidate  
24 genes to further experimental validation during rice genetics research and breeding.  
25 To enhance identification of novel genes regulating important biological processes  
26 and agronomic traits in rice and other crop species, we released the source code of  
27 constructing high-quality RNA-seq-based GCN and rice RNA-seq-based GCN, which  
28 can be freely downloaded online at <https://github.com/czllab/NetMiner>.

29 **Key words: Ensemble pipeline, RNA-seq-based GCN, Agronomic traits, LncRNA**  
30 **gene, CircRNA gene**

31

## 32 Introduction

33 The complex cellular network formed by the interacting macromolecules underlie an  
34 organism's phenotypes (Kitano, 2002a, 2002b; Vidal et al., 2011). Reconstructing a  
35 complete map of the cellular network is crucial for understanding an organism's  
36 genetic architecture underlying phenotypes. In animals, multiple types of networks  
37 have been built based on multi-level '-omics' datasets from genome, transcriptome,  
38 proteome, epigenome, metabolome and other subcellular systems (Mitra et al., 2013).  
39 In plants, most of the current available '-omics' dataset comes from the transcriptome  
40 analysis, with relatively few studies generating other types of '-omics' datasets (Ma et  
41 al., 2013). The rapid accumulation of large-scale open access plant transcriptome data  
42 provides the great potential for identifying the molecular networks underlying diverse  
43 functions. Co-expression meta-analysis is a powerful method for reconstructing gene  
44 co-expression network using transcriptome data. This method combines expression  
45 profiles from all available experimental conditions, aims to predict the statistically  
46 significant functional associations between genes. The extensibility and easiness to  
47 apply make it a powerful tool for inferring the biological roles of uncharacterized  
48 genes (Bergmann et al., 2003; Gerstein et al., 2014; Ma et al., 2013; Mutwil et al.,  
49 2011; Stuart et al., 2003).

50 For co-expression meta-analysis, many algorithms have been proposed to construct  
51 the gene networks. However, it has been shown that the outcome of network inference  
52 varies between tools, and the single network inference approach has inherent biases  
53 and is unable to perform optimally across all experimental datasets (De Smet and  
54 Marchal, 2010; Marbach et al., 2012). In addition, how to clean-up the links occurring  
55 by accident in a gene co-expression network and select biologically significant  
56 associations is also a critical procedure for modeling the authentic gene relations  
57 (Alipanahi and Frey, 2013; Usadel et al., 2009). Moreover, the current computational  
58 methods are mainly designed for analyzing microarray dataset. Indeed, microarrays  
59 are intrinsically limited for measuring a relative small dynamic range of gene  
60 expression and only representing a subset of genomic contents (Abdullah Sayani et al.,  
61 2006; Mutwil et al., 2011). Compared with microarrays, RNA sequencing (RNA-seq)  
62 emerges as a new approach to transcriptome profiling, which provides broader  
63 dynamic range of measurements allowing genome-wide detection of novel, rare and  
64 low-abundance transcripts. However, the majority of co-expression meta-analyses  
65 have been neglected the rapid growing availability of next-generation RNA-seq data  
66 (especially in plants). Its potential capacity in co-expression network inference has not  
67 been well studied.

68 In this study, we designed a novel ensemble pipeline for inferring high-quality Gene  
69 Co-expression Network (GCN) using RNA-seq data by integrating the predictions of  
70 three different network inference algorithms. **Since the multiple types of networks in**  
71 **the model plant, *Arabidopsis*, has been constructed and widely analyzed, we directly**  
72 **applied this pipeline to the important crop species, rice, to enhance its efficiency of**  
73 **molecular breeding.** We compiled a standard physical and non-physical set of positive  
74 and negative functional link datasets between genes derived from 4 known biological  
75 networks and evaluated the quality of our network. In the case study, bottom-up  
76 subnetwork analysis revealed that the usefulness of reconstructed RNA-seq-based  
77 gene co-expression network for realistic biological problems. Particularly, we showed  
78 that the potential application of our method for predicting the biological roles of the  
79 uncharacterized genome elements including long non-coding RNA (lncRNA) and  
80 circular RNA (circRNA) genes. Our study revealed the massive genetic regulatory  
81 relationships associating with cellular activities and agronomic traits, which provide a  
82 valuable data source for selecting candidate genes to accelerate rice genetics research.

## 83 Results

### 84 Network construction and evaluation

85 To evaluate the quality and reliability of publicly available RNA-seq dataset, we  
86 analyzed 348 RNA-seq transcriptomes of the important monocot crop species rice  
87 after removing the unreliable genes and samples (for details, see Dataset 2, Materials  
88 and methods section). After quality filtering and trimming, a total of 12,458,505,209  
89 reads were remained in the samples, 75.2% of which were mapped to the MSU7.0  
90 reference genome and 71.4% were mapped uniquely (see Dataset 2). Of the genes  
91 (MSU7.0 reference set) covered with RNA-Seq reads, 98.4% have coverage of > 50%  
92 of the gene length (see Supplementary Information, Fig.S1A). Despite of the large  
93 difference in the number of mapped reads between samples, the percentage of  
94 expressed genes is similar in most of them, ranging from 32% (10th percentile) to  
95 66% (90th percentile), and as the number of mapped reads increases, the ratio of the  
96 number of expressed genes is rapidly increased to saturation (see Supplementary  
97 Information, Fig.S1B). We tested several normalization methods to compute the  
98 expression abundance and expression correlations between genes and samples, the  
99 tissue-specific expression pattern and enrichment results of rice genes showed that  
100 these RNA-seq data are highly reliable (see Supplementary Text, Fig.S2-Fig.S6, Table  
101 S1 and Dataset 3 for details).

102 We comprehensively analyzed whether the co-expression between genes is associated

103 with their biological roles, and demonstrated that functionally related genes are often  
104 to be co-expressed in our RNA-seq dataset (see Supplementary Text, Fig.S7-Fig.S8,  
105 Dataset 4 for details). Based on this, we designed a new ensemble pipeline to build  
106 RNA-seq-based gene co-expression network by integrating the predictions of three  
107 state-of-the-art network inference methods, including Weighted Gene Correlation  
108 Network Analysis (WGCNA) (Langfelder and Horvath, 2008), Graphical Gaussian  
109 Model (GGM) (Schäfer et al., 2001) and Bagging the Conservative Causal Core of  
110 Network (BC3NET) (de Matos Simoes and Emmert-Streib, 2012), based upon an  
111 un-weighted voting system and rescoring the co-expression links (see Materials and  
112 Methods for details). **We here did select these three inference methods but not the**  
113 **other existing approaches is because of either their high computational complexity or**  
114 **the inconsistent data source (Feizi et al., 2013; Friedman et al., 2008; Huynh-Thu et**  
115 **al., 2010; Qin et al., 2014).** We constructed the co-expression network of rice which  
116 included 16770 genes with 146,419 links. This network shows the small-world  
117 characteristic with an average path length between any two nodes is equal to 6.28. The  
118 distribution of connection degrees obeys the truncated power-law where most nodes  
119 have a few co-expression partners with only a small ratio of hub nodes associating  
120 with a large number of partners (see Supplementary Information, Fig.S9A). The  
121 negative correlation between degrees and clustering coefficients of genes reveal  
122 hierarchical and modular characteristics of network and the possible synergistic  
123 regulation of gene expression (Supplementary Information, Fig.S9B) (Bergmann et al.,  
124 2003).

125 We evaluated the performance of the ensemble inference pipeline in rice. Since there  
126 are no gold standard reference co-expression networks available in rice, we compiled  
127 as replacement a standard set of positive links (9390203 interactions), by capturing  
128 gene pairs that were contained in the same Gene Ontology (GO) categories, the same  
129 pathways, interact with each other in the protein-protein interaction network or linked  
130 in the probabilistic functional gene network (RiceNet), and a standard set of negative  
131 links (272997 interactions) based on the functional dissimilarities between genes (for  
132 details, see Materials and methods section). We used fold enrichment to measure the  
133 relationship of two data sets (our network and standard positive functional links / our  
134 network and standard negative functional links): the larger the proportion of the  
135 number of shared elements divided by that expected by random chance, the closer  
136 they are (see Materials and methods for details). We found that the co-expression  
137 relationships connecting highly or frequently expressed gene pairs were positively  
138 associated with the positive standard links and were negatively associated with the  
139 negative standard links (see Supplementary Information, Fig.S10). **Meanwhile, we**  
140 **also observed that the expression sample number of co-expression link (defined as the**

141 total number samples which simply plus the number of gene A expressed samples and  
142 the number of gene B expressed samples) is a more reliable factor than its expression  
143 level (defined as the expression abundance summation of gene A and gene B) to affect  
144 the fold enrichment of the standard links (see Supplementary Information, Fig.S10).  
145 These outcomes indicated that the positive standard links had reliably captured the  
146 co-expression links between genes. Using the standard datasets, we found that the  
147 network structure obtained by our ensemble inference method was consistently better  
148 than the networks built by the individual method with higher enrichment for positive  
149 links and lower enrichment for negative links (Fig.1). These results suggested that the  
150 committee of different methods can reduce the bias occurring in a single inference  
151 method and provide more reliable predictions with higher sensitivity and specificity.  
152 We observed that the folds of enrichment are not obviously improved or are slightly  
153 decreased by the integrated networks from 6 data set (Fig.1A, the GGM method, line  
154 highlighted in yellow) than that of each single data set, indicating that integrating the  
155 networks built using different data normalization methods might have no obvious  
156 effects on the structure of inferred network (Fig.1). Co-expression is actually one of  
157 the inputs used to build the probabilistic functional gene network (RiceNet), which  
158 were included in the standard positive links. To examine whether this has effect on our  
159 evaluation results, we carried out the fold enrichment analysis after removing the links  
160 contained in RiceNet from the standard positive links. We found that integrating the  
161 functional links of RiceNet into the standard positive links has no effect on the results  
162 of comparing the quality of our network with the other networks obtained by the  
163 single algorithm (see Supplementary Information, Fig.S11). Based on the novel  
164 RNA-seq dataset, we also examined whether a large fraction of potential interactions  
165 was recovered by our collected RNA-seq dataset, and found that the most general  
166 transcriptional links were already established reliably with these 348 rice RNA-seq  
167 samples (see Supplementary Text for details).

## 168 **Prediction of gene functions through co-expression subnetworks**

169 We observed that our reconstructed RNA-seq-based gene co-expression network is  
170 always positive predictor of functional associations for the protein-protein interaction  
171 network and probabilistic functional gene network, GO network and pathway network  
172 (see Supplementary Text, Fig.S12). Meanwhile, we also observed that many genes  
173 under the same GO functional category are significantly more connected to each other  
174 than expected by chance (see Supplementary Text, Dataset 5). Therefore, we adopted  
175 GO enrichment analysis of a gene's co-expression neighborhood as a tool to predict  
176 its biological functions (Vandepoele et al., 2009). For each gene belonging to a given  
177 GO category, we asked whether the GO enrichment in its co-expression neighborhood

178 could infer its correct function: an inference is called true positive if and only if the  
179 predicted GO term is more specific than its known GO terms or is equal to the known  
180 GO terms. In the enrichment significance level of corrected  $p$ -value smaller than 0.05,  
181 we found that 15.50% (Sensitivity) annotated functions were correctly inferred based  
182 on 10545 annotated genes in rice network. If we used only the gene annotations on the  
183 second and third layers of the directed GO graph for inference, the Sensitivity was  
184 increased to 21.66%. We found that the 21.27% (Precision) of all inferred functions  
185 are true positives and this number is improved to 25.38% when we only adopted the  
186 second and third layers of directed GO graph. These results might be suggesting that  
187 the incompleteness or errors in the GO annotations of rice genes.

188 The relatively low Sensitivity and Precision of our network in function inference  
189 might be due to the simple scoring metrics. We here further analyzed the predictive  
190 performance of our network based on the Critical Assessment of protein Function  
191 Annotation (CAFA) metrics (Tzafrir et al., 2003) (see Materials and Methods). To  
192 eliminate the effects of the incompleteness and errors of GO annotations, we removed  
193 the genes with I) the number of known annotations smaller than 3; II) the number of  
194 predicted annotations smaller than 3 and III) the variation coefficient of the number of  
195 known annotations and the number of predicted annotations larger than 0.5. To order  
196 to produce the Receiver Operating Characteristics (ROC) and Precision-Recall (PR)  
197 curves, we calculated the sensitivities, 1-specificities and precisions under different  
198 thresholds ( $-\log(\text{corrected } q\text{-value})$ ). For the purpose of correcting different depths of  
199 GO predictions, we also calculated the weight value of each GO term and obtained the  
200 weighted ROC and PR curves. The weighted ROC and PR curves obtain the larger  
201 AUC score (70.01%) and maximum F-measure ( $F\text{-max} = 0.54$ ) than the not weighted  
202 ones ( $\text{AUC} = 68.23\%$ ,  $F\text{-max} = 0.53$ ) (see Fig.2), indicating that our gene network can  
203 effectively predict the difficult or less frequent GO terms (see Fig.2). In addition, we  
204 further compared the predictive performances of our network with RiceNet using the  
205 same evaluation criteria as employed in our study. We observed that our co-expression  
206 network is comparable or better than the RiceNet in terms of the ROC and PR curves  
207 (Fig.2). Moreover, we also found that the semantic similarities between the known  
208 GO terms and our predicted GO terms are obviously higher than the random ones  
209 ( $p\text{-value} = 5.24\text{E-}10$ , paired t-test). These results indicated that our RNA-seq-based  
210 gene network can be applied for inferring the potential functions of unknown genes.

211 In addition to the neighboring gene analysis above, we used two examples below to  
212 demonstrate the stricter and intuitive method of RNA-seq-based gene co-expression  
213 network analysis for inferring the gene functions. In flowering plants, floral organ  
214 development is a very important biological process. We therefore first selected a priori



215 guide gene *OsMADS16* involving in flower development to obtain a co-expression  
216 subnetwork consisting of 37 closely connected neighbors within two-layer links from  
217 the guide genes (see Fig.3A and Dataset 6). We found that 15 genes were involved in  
218 flower development process, with ~ 203-fold enrichment. For example, 11 members  
219 of MADS-box family, which were verified involving in the determination of floral  
220 organ identity and development, are effectively captured in this subnetwork. Moreover,  
221 this subnetwork includes the well-known genes *DL*, *Wda1* and *DPW*, which have  
222 been experimentally validated to control the floral organ identity, anther and pollen  
223 development (Jung et al., 2006; Nagasawa et al., 2003; Shi et al., 2011). Interestingly,  
224 we did not find that two YABBY domain containing genes *OsYABBY1* and *OsYABBY6*  
225 are annotated involving in floral organ development in rice, but their *Arabidopsis*  
226 homologs of *YABBY2* and *YABBY1* were associated with the inflorescence meristem  
227 growth and regulation of floral organ development (Siegfried et al., 1999). The  
228 connections between the unannotated genes (gray nodes) and known genes within a  
229 subnetwork provide clues for their associations with specific biological processes. For  
230 example, *LOC\_Os07g09020* involves in the reproduction and embryo development,  
231 whose links with *OsMADS3*, *OsMADS4* and *DL* enable further targeted experimental  
232 validations.

233 Second, we used another guide gene *OsCESA4* involving in cell wall metabolism to  
234 build a subnetwork (Fig.3B and Dataset 6). The resulting subnetwork was made up of  
235 139 genes with ~96-fold enrichment, including 4 homologs of *OsCESA4*: *OsCESA1*,  
236 *OsCESA3*, *OsCESA7* and *OsCESA9*, and 14 other genes associated with the cell wall  
237 metabolism. In addition, this subnetwork also captures 28 genes (pink nodes) whose  
238 *Arabidopsis thaliana* homologs were involved in cell wall metabolism. For example,  
239 *LOC\_Os01g06580*, encoding a fasciclin domain containing protein, is a homologous  
240 gene to *AT5G03170* which is involved in secondary cell wall biogenesis. Two genes  
241 of *LOC\_Os01g62490* and *LOC\_Os03g16610* are laccase precursor proteins are both  
242 homologs to *LAC17* involved in cell wall biogenesis. *AT1G09540*, an *Arabidopsis*  
243 homolog of two rice MYB family transcription factors of *LOC\_Os05g04820* and  
244 *LOC\_Os01g18240*, are participating in cell wall macromolecule metabolism and  
245 xylem development. We also noted that 14 genes labeled with blue nodes, involving  
246 in carbohydrate metabolism, associating with microtubule or resembling to known  
247 cell wall metabolism genes in function domain, are recovered in this gene subnetwork.  
248 All these genes are the potential candidates for the further functional investigation.  
249 Especially, the known cell cycle genes *LOC\_Os04g28620* and *LOC\_Os04g53760* are  
250 also captured in this subnetwork, confirming that cell wall metabolism and cell cycle  
251 are two closely associated processes.

## 252 Construction of regulatory subnetworks for gene functional analysis

253 We explored the potential value of motif-guided analysis (Ma et al., 2013) in building  
254 regulatory network and finding functionally related genes using two examples. Cell  
255 cycle is a highly conserved biological process in higher eukaryotes. From G1 phase to  
256 S phase of the cell cycle is controlled by the E2F transcription factors, which bind to a  
257 conserved DNA motif WTTSSCSS (with “W” standing for “A” or “T” and “S”  
258 standing for “C” or “G”) (Vandepoele et al., 2005). We used this motif to retrieve  
259 1093 genes from the rice network. Out of the 180 cell cycle genes annotated in rice  
260 (totally 55986 genes), 33 cell cycle genes were included in these 1093 genes, resulting  
261 in 9.4-fold enrichment. We used the cell cycle genes and the genes that were directly  
262 linked to them to form a regulatory network (totally 104 genes, Fig.4A and Dataset 6).  
263 We observed that a large number of genes (red nodes in Fig.4A) encode proteins  
264 participating in regulation of cell cycle, DNA replication, chromatin dynamics and  
265 DNA repair. The currently known cell cycle genes include three cyclin genes, one E2F  
266 transcription factor, 9 DNA replication origin factors, two checkpoint regulators, 13  
267 DNA replication or repair proteins and 10 other genes with unknown biochemical  
268 functions but were annotated playing important roles during cell cycle. **In addition,**  
269 **this subnetwork also includes 18 genes whose *Arabidopsis* homologs participate in**  
270 **regulation of cell cycle, DNA replication, DNA repair and chromatin dynamics. Also**  
271 **recovered are four genes including *LOC\_Os01g64900*, *LOC\_Os03g49200*, *LOC\_Os***  
272 ***07g18560* and *LOC\_Os09g36900* whose *Arabidopsis* homologs have not annotated**  
273 **biochemical function but were involved in cell cycle. Although some genes are not**  
274 **annotated with direct participation of cell cycle, their molecular structure and function**  
275 **domain indicated their potential roles in it, such as the ribonuclease H2 subunit B**  
276 **(*LOC\_Os04g40050*), ATP-dependent RNA helicase (*LOC\_Os11g44910*), ribonuclease**  
277 **H2 subunit B (*LOC\_Os04g40050*) and the BRCA1 C Terminus domain containing**  
278 **protein (*LOC\_Os08g31930*). All these genes are the potential candidate cell cycle**  
279 **genes for further investigation.**

280 WRKY transcription factors play important roles in regulation of plant stress response  
281 by binding the W-box sequence TTGACY (with “Y” standing for “C” or “T”) (Chen  
282 et al., 2012; Rushton et al., 2010). Similarly, we extracted a total of 1329 genes  
283 associating with W-box, from which a subset of 88 known stress response genes out  
284 of 996 genes relating to stress response in rice were found, achieving the fold  
285 enrichment of 3.72. We also constructed a regulatory network using the 88 genes and  
286 the genes with W-box that were directly linked to them (totally 389 genes, Fig.4B and  
287 Dataset 6). This subnetwork includes 172 genes that are regulated by different types  
288 of environmental stresses (red node). Among them, 138 rice genes and 34 homologs



289 in *Arabidopsis* are annotated in the reference genomes relating to abiotic and biotic  
290 stresses. The majority of *Arabidopsis* homologs of these genes are experimentally  
291 confirmed involving in the biological regulation of phosphate starvation, water  
292 deprivation, nitrate, hypoxia, salt, cold, heat, chitin, sugar and oxidative stresses.  
293 Particularly, 53 of 172 abiotic stress response genes whose *Arabidopsis* homologs are  
294 reacted to the ethylene (ETH), abscisic acid (ABA), salicylic acid (SA) or jasmonic  
295 acid (JA), which is in accordance with the fact that WRKYs play roles in the plant  
296 abiotic stress by invoking the ETH-, ABA-, SA- or JA-mediated signaling pathways  
297 (Chen et al., 2012). Moreover, 36 genes play important roles in regulating plant  
298 immune responses to pathogens including WRKYs, NB-ARC domain containing  
299 resistance proteins, NBS-LRR domain containing resistance proteins, kinase proteins  
300 and other verified defense members of the plant innate immune system were also  
301 contained in this network (see Dataset 6). This is completely supported by the  
302 transcriptional reprogramming network model of the WRKY-mediated plant immune  
303 responses (Eulgem and Somssich, 2007). In addition, this gene subnetwork also  
304 included 8 genes whose *Arabidopsis* homologs are associated with the seed  
305 development, dormancy and germination. In agreement with the fact that the SA and  
306 ABA antagonizes gibberellin (GA)-promoted seed germination; 6 of these genes  
307 participate in the SA- and ABA-mediated signaling pathways (Xie et al., 2007).  
308 Interestingly, three genes of *LOC\_Os03g12290*, *LOC\_Os01g24550* and *LOC\_Os01g*  
309 *64470* involving in leaf senescence are also placed in this network, with *LOC\_Os 01g*  
310 *64470* involving in the SA- and JA-mediated signaling pathway, which is supported  
311 by the fact that the WRKYs function in leaf senescence by modulating the JA and SA  
312 equilibrium (Miao and Zentgraf, 2007). This subnetwork successfully captured the  
313 W-box related genes that can facilitate further studies the functions of uncharacterized  
314 genes and help us to understand the regulatory mechanisms of plant responding to  
315 various stresses.

316 In addition, we also used two miRNAs of osa-miR156 and osa-miR396 to capture the  
317 functionally related genes based on microRNA target enrichment analysis, which is  
318 performed similar with motif enrichment analysis (Ma et al., 2013). We observed that  
319 a large number of genes involving in cell division and organ development were  
320 captured in this gene subnetwork, for example, two TCP transcription factors of  
321 *LOC\_Os01g55100* and *LOC\_Os11g07460* (see Fig.S13 and Dataset 6). Meanwhile,  
322 we also found that many genes relating to stress tolerance were placed in the  
323 subnetwork of osa-miR156, for instance, a WRKY transcription factors *LOC\_Os*  
324 *10g18099* (see Fig.S13 and Dataset 6). These obtained results well confirm the  
325 biological roles of these two miRNAs (Rodriguez et al., 2010; Stief et al., 2014; Wu et  
326 al., 2009). Taken together, all these outcomes indicated that the rice RNA-seq-based

327 gene co-expression network could be converted to highly reliable regulatory network  
328 for further studying gene regulations.

### 329 **Co-expression analysis of genes controlling the important agronomic** 330 **traits**

331 For the perspective of system biology, the phenotype of an organism was controlled  
332 by functionally linked genes involving in the related biological processes. Given the  
333 co-expressed genes tend to have the related biochemical functions; we next want to  
334 use the co-expression relationships between genes to assign the agronomic traits for  
335 unknown genes. This is especially important for identifying the candidate genes in  
336 Quantitative Trait Loci (QTL) mapping, Genome-Wide Association Study (GWAS) or  
337 in reverse genetic studies. We collected 1031 known rice genes with the well-studied  
338 functions through wet lab experiments. For these genes, we found that 934 genes were  
339 expressed in our collected RNA-seq datasets and 623 genes were in network with  
340 12125 connections. To examine the potential capacity of our RNA-seq-based gene  
341 co-expression network for associating genes with the agronomic traits, we analyzed  
342 the density of co-expression links between genes of within and between agronomic  
343 traits. We found that 262 co-expression links out of 88041 all possible links within the  
344 common agronomic traits and that 252 co-expression links out of 982302 all possible  
345 links between the different agronomic traits were captured in network, with ~11-fold  
346 enrichment of links within the agronomic traits. In details, we found that several  
347 agronomic traits whose genes were tightly clustered together relative to the average  
348 link density of whole co-expression network (Supplementary Text, Table S2). For  
349 example, an agronomic trait, source activity, measuring the capacity of making  
350 photosynthetic products; whose genes was highly aggregated in network with the  
351 enrichment fold of 47.81 and the corrected  $p$ -value of 3.96E-117. Besides, genes  
352 associating with culm leaf, panicle flower, eating quality and tolerance are also  
353 significantly clustered together. Moreover, we performed the permutation test,  
354 discovering found that co-expression link densities between genes of same agronomic  
355 traits were significantly larger than random control gene set (Supplementary Text,  
356 Table S2). These results indicated that our gene networks can be used to discover the  
357 gene related to important agronomic traits by co-expression links.

### 358 **Function discovering for lncRNA genes**

359 Long non-coding RNAs (lncRNAs) have been shown to play important roles in the  
360 kingdoms of plants and animals (Ranzani et al., 2015; Zhang et al., 2014). Given that  
361 the reconstructed RNA-seq-based co-expression network can successfully associate  
362 genes with biological functions and phenotypes of interest, we next wish to discover

363 the functions for uncharacterized lncRNA genes using network-based method. We  
364 downloaded the known lncRNAs of rice identified in previous studies (Zhang et al.,  
365 2014). We then combined these lncRNA genes with MSU7.0 reference genes to  
366 establish co-expression network based on the ensemble inference pipeline. The  
367 obtained network is composed of 24875 genes, containing 24014 protein-coding gene  
368 and 861 lncRNA genes connected by 1357039 edges. Compared with the previous  
369 protein-coding gene network, 7692 novel protein-coding genes were captured and  
370 linked with 817 lncRNA genes. As there is no gold standard available to evaluate the  
371 predictive performance, we adopted gene-guide subnetwork analysis to illustrate the  
372 potential capacity of this network for lncRNA function discovering. We selected a  
373 well-studied lncRNA gene of *XLOC\_057324*, which was verified involving in panicle  
374 development and fertility, to establish a gene subnetwork consisting of the two-step  
375 co-expression neighborhoods (Fig.5 and Dataset 7). In this subnetwork, 4 genes  
376 including *SSDI*, *PLAI*, *DEPI* and *GSD1* related to panicle development or fertility. In  
377 addition, we also found that 7 genes (pink nodes) whose *Arabidopsis* homologs  
378 participate in meiosis, embryo development or reproductive process. According to the  
379 functional annotation, some genes (blue nodes) might be also involved in pollen  
380 development, such as two cyclin genes *CYCA2* and *CYCD2*. Interestingly, 3 lncRNAs  
381 of *XLOC\_061753*, *XLOC\_006119* and *XLOC\_031878* expressed in the reproductive  
382 organs are contained in this subnetwork. These results are in good agreement with the  
383 experimentally verified role of *XLOC\_057324*.

### 384 **CircRNA gene identification and function analysis**

385 CircRNA is an RNA molecule forming a covalently closed continuous loop that has  
386 been discovered in various species across the domains of life with distinct sizes  
387 (Memczak et al., 2013; Ye et al., 2015). The functions of circRNAs are largely  
388 unknown and hard to investigate. Therefore, we try to classify them through gene  
389 co-expression network. We first identified 14325 circRNAs in rice derived from 5284  
390 genes including 4609 protein-coding genes, 675 noncoding genes (see Materials and  
391 Methods for details). 43 of these genes including 27 protein-coding genes and 16  
392 non-coding genes produce the circRNAs with the percentage larger than 90% in at  
393 least one sample. We analyzed the distribution of the number of detected circRNAs  
394 and found that a majority of circRNAs were identified in one sample with relative  
395 small number of circRNAs were detected in more than 3 samples (Fig.S14A). Though  
396 a large number of circRNAs were detected in relative small number of RNA-seq  
397 samples, 63 circRNAs (transcribed from the protein-coding genes), identified in more  
398 than 10 samples and supported by more than 26 junction reads, were captured in the  
399 gene co-expression network. Moreover, we found that the primary genes transcribing

400 these circRNAs were not contained in the co-expression network. We predicted the  
401 functions of these circRNAs using GO enrichment analysis of their co-expression  
402 neighborhoods. Indeed, these circRNAs are related to a broad range of biological  
403 functions, for example protein phosphorylation, ATP binding and photosynthesis  
404 (Fig.S14B). These results indicated that a great number of circRNAs play important  
405 biological roles but not are the transcriptional noise.

## 406 Discussion

407 The phenotypes of an organism are determined by the coordinated activity of many  
408 genes and gene products. To gain insight into the genetic foundation underlying the  
409 complex biological processes and phenotypes, we developed a novel analytic pipeline  
410 for constructing high-quality RNA-seq-based co-expression network and predicting  
411 gene function and regulations. we applied this pipeline to the important crop species  
412 rice. The obtained co-expression links between genes were ranked by confidence  
413 score, expression level and expression sample number. The thresholds of these  
414 measures can be selected as the indicators of co-expression reliability for the further  
415 targeted experimental validation. The detailed analysis of the topology properties of  
416 network demonstrates that the degree frequency distribution follows the truncated  
417 power-law and network structure is highly modular. Using the rice gold standards and  
418 bottom-up co-expression subnetwork analysis, we showed that this analysis pipeline  
419 can be effectively applied to study the gene function and regulation. Particularly, the  
420 potential application value of RNA-seq gene network for predicting biological roles of  
421 lncRNA and circRNA genes are well demonstrated. Overall, our analysis provides  
422 new insights into the regulatory code underlying transcription control and a starting  
423 point for understanding the complex regulatory system.

424 Compared with the sequence-based functional annotation, a great advantage of gene  
425 co-expression-based inference approach is that homologs are not required for a gene  
426 to receive a prediction. Actually, it is the case when a novel function appears for a  
427 particular species and the genes participating in the new biological process do not  
428 have corresponding homologues in other species. This is especially interesting for the  
429 non-coding RNAs because only short regions of non-coding RNA transcripts are  
430 limited by sequence- or structure-specific interactions, compared to the protein-coding  
431 gene; this difference in selection pressure makes it very difficult to find orthologous  
432 non-coding RNAs by their sequences. Indeed, using the BLAST search against NCBI  
433 Reference Sequence Database (RSD), we found that 87% and 89% of unannotated  
434 genes and lncRNA genes do not have homologous genes in other species, respectively.  
435 The functional analysis of rice lncRNA gene of *XLOC\_057324* suggested that our

436 RNA-seq-based gene network can be effectively applied to annotate the functions of  
437 non-coding genome elements.

438 For RNA-seq-based gene co-expression network investigators, the creation of novel  
439 computational methods for building high-quality network poses a future fundamental  
440 challenge. According to our best knowledge, only four existing methods including  
441 Pearson's Correlation Coefficient (PCCs), WGCNA, Canonical Correlation Analysis  
442 (CCA) and SpliceNet have been used to establish the RNA-seq gene co-expression  
443 networks (Giorgi et al., 2013; Hong et al., 2013; Iancu et al., 2012; Yalamanchili et al.,  
444 2014). Moreover, some of these inference tools are unable to be applied to the  
445 large-scale expression dataset owing to their high computational complexity. For the  
446 uncertainty and complexity of mechanism models underlying the RNA-seq data, we  
447 designed a novel ensemble-based inference pipeline to establish the high confidence  
448 RNA-seq gene co-expression network. Our outcomes demonstrate that the committee  
449 of three inference methods provides more robust and less false positive and false  
450 negative results than single algorithm. The improved performance of our ensemble  
451 inference method depends on the voting and rescoring scheme which can reduce the  
452 bias occurring in a single learning method and assign a higher confidence to the  
453 interactions that are repeatedly retrieved by different methods. Indeed, the standpoint  
454 of aggregating the results of different algorithms has been adopted in various contexts  
455 and it has proven to be effective in a variety of applications (Lertampaiporn et al.,  
456 2013; Liu et al., 2007; Yang et al., 2010).

457 In principle, gene co-expression meta-analysis can only detect co-regulations between  
458 genes which are co-expressed constantly or are sometimes co-expressed but otherwise  
459 silent. However, many activation patterns of gene groups appear only under the  
460 specific experimental conditions but behave independently under the other conditions,  
461 which might not be captured by our method. Especially, for lncRNA and circRNA  
462 genes, their expression patterns demonstrated highly spatiotemporal specificity. To  
463 overcome this problem, the high-efficiency bi-clustering methods can be integrated  
464 into our model to reveal the transcriptional gene interactions presented only under a  
465 specific subset of the experimental conditions (Madeira and Oliveira, 2004). Our  
466 approach can further improved by I) expanding our ensemble pipeline with other  
467 high-efficiency inference methods (Hase et al., 2013), II) employing more reasonable  
468 voting and rescoring schemes to generate the consensus networks.

## 469 **Materials and methods**

### 470 **Dataset preprocessing**

471 We downloaded 456 rice primary RNA-seq samples from the NCBI Sequence Read  
472 Archive (see Dataset 1 and 2 for details), with the keywords of “*Oryza sativa*”  
473 [Organism] AND “platform illumina” [Properties] AND “strategy rna seq” [Properties]  
474 (accessed on May 29, 2014). These RNA-seq samples contained a wide spread of  
475 experimental conditions, tissue types and developmental stages. After the SRA files  
476 were gathered, the archives were extracted and saved in FASTQ format using the SRA  
477 Toolkit. The FASTQ files were firstly trimmed using Trimmomatic software (version  
478 0.32) (Bolger et al., 2014) with the default settings, except for an additional parameter  
479 of minimum read length at least 70% of original size. Then, the fastq\_quality\_filter  
480 program included in FASTX Toolkit was adopted to further filtrate the FASTQ files,  
481 with the minimum quality score 10 and minimum percent of 50% bases that have a  
482 quality score larger than this cutoff value. Surviving RNA-seq samples were mapped  
483 to the MSU7.0 reference genomes (55986 genes) using TopHat v2.0.4 with the default  
484 settings except for “--max-multihits 1” (Trapnell et al., 2009). The PCR and  
485 optical/sequencing-driven duplicate reads were removed using the Picard tools. After  
486 reads mapping, the uniquely aligned reads count (RAW) and Fragments Per Kilobase  
487 Of Exon Per Million Fragments Mapped (FPKM) of each gene was calculated relative  
488 to the reference gene model using the HTSeq-count (v0.5.4) and Cufflinks software  
489 (v2.1.1), respectively (Anders et al., 2014; Trapnell et al., 2012). The unreliable  
490 samples and genes were filtered according to the following three criteria: I) The  
491 samples, in which the percentage of the number of genes with expression value  
492 smaller than 10 reads is larger than 90%, were not considered for further analysis; II)  
493 We did not consider the genes whose expression value is less than 10 reads in more  
494 than 80% samples; III) Genes with the variation coefficient of expression values  
495 smaller than 0.5 were excluded from subsequent analysis. After filtering, we got two  
496 expression datasets composed of 348 RNA-seq samples and 24775 genes were. The  
497 filtered RAW dataset were further corrected using four normalization methods: I)  
498 Upper Quartile (UQ) (Robinson et al., 2010); II) Trimmed Mean of M values (TMM)  
499 (Robinson et al., 2010); III) Relative Log Expression (RLE) (Robinson et al., 2010)  
500 and IV) Variance Stabilizing Transformation (VST) (Anders and Huber, 2010).

501 The microarray gene expression data were extracted from both ATTED-II database  
502 and Rice Oligonucleotide Array Database (ROAD) (Cao et al., 2012; Obayashi et al.,  
503 2009). The Gene Ontologies (GOs) were downloaded from Plant GeneSet Enrichment  
504 Analysis Toolkit (PlantGSEA) (Yi et al., 2013). We downloaded biological pathways  
505 from two data sources including PlantGSEA database and Plant Metabolic Network  
506 (PMN) (<http://pmn.plantcyc.org/>). The gene sets of transcription factor family were  
507 downloaded from Plant Transcription Factor Database (PlantTFDB) (Jin et al., 2013).  
508 MicroRNAs and their related targets were collected from the Plant MicroRNA Target



509 Expression database (PMTED) and Plant MicroRNA database (PMRD) (Zhang et al.,  
510 2010). Known agronomic trait genes were collected from both Q-TARO database  
511 (Yonemaru et al., 2010) and literatures. Tos17 mutant phenotypes were extracted from  
512 Rice Tos17 Insertion Mutant Database (Hirochika et al., 1996). The phenotypes were  
513 associated with MSU7.0 gene locus identifiers through BLASTN alignments of Tos17  
514 flanking sequences obtained from NCBI website. Protein-protein interaction network  
515 of rice were downloaded from PRIN (Gu et al., 2011). Probabilistic functional gene  
516 network of rice was obtained from RiceNet data portal (Lee et al., 2011).

## 517 **Gene co-expression network construction**

518 We developed an ensemble-based inference pipeline for constructing the high-quality  
519 RNA-seq-based Gene Co-expression Network (GCN) based upon combining multiple  
520 inference algorithms, then aggregating their predictions through an unweighted voting  
521 system and rescoring co-expression links. Our ensemble-based inference system was  
522 designed based on the hypothesis that the different network inference methods have  
523 complementary advantages and limitations under the different contexts. To select base  
524 inference methods for constructing an ensemble system, five algorithms were initially  
525 tested and evaluated, including the weighted gene co-expression network analysis  
526 (Langfelder and Horvath, 2008), graphical Gaussian model (Schäfer et al., 2001),  
527 bagging statistical network inference (de Matos Simoes and Emmert-Streib, 2012),  
528 graphical lasso model (Friedman et al., 2008) and tree-based method (Huynh Thu et  
529 al., 2010). Since graphical lasso and tree-based method have high computational  
530 complexity and are infeasible for large number of RNA-seq dataset, we did not adopt  
531 these two algorithms for subsequent network construction. The flowchart for building  
532 high confidence RNA-seq-based gene co-expression network was depicted in Fig.6.  
533 In details, our procedure for producing the high-quality gene co-expression network  
534 was started from 6 RNA-seq datasets as described in Dataset preprocessing. Based on  
535 the 6 RNA-seq expression datasets, the weighted co-expression network inference,  
536 graphical Gaussian model and bagging statistical network inference were adopted to  
537 obtain 18 initial gene co-expression networks using the R packages of WGCNA,  
538 GeneNet and BC3NET, respectively (available from the CRAN repository). Since the  
539 outputs of WGCNA and GeneNet produced the long ordered list of confidence scores  
540 (topological overlap for WGCNA and partial correlation coefficient for GeneNet) for  
541 an enormous amount of gene pairs, we designed a random permutation model to  
542 choose the restrict threshold that roughly identifies functional co-expression links. We  
543 repeatedly created 100 times random datasets to obtain a series of background  
544 distributions, by randomly shuffling the associations from genes to expression profiles,  
545 and used the average of 99.99th percentile of these distributions (corresponding to the

546 probability of  $10^{-4}$  that two genes are connected by chance) to define the threshold.  
547 After obtaining initial networks, we employed two-step voting procedure, including  
548 voting within inference method and voting among the inference methods, to construct  
549 the high-quality gene co-expression network. In the first step of voting procedure, we  
550 selected the links included in more than two networks of all 6 initial co-expression  
551 networks, which were built by applying the single network inference algorithm to 6  
552 RNA-seq datasets, to establish a consensus gene network (i.e. intra-method consensus  
553 network). In second step of voting procedure, we pick the co-expression relationships  
554 contained in more than one network of three intra-method consensus networks to  
555 establish the final co-expression network.

556 The confidence score calculation procedure for each gene pair of the final RNA-seq  
557 gene co-expression network was performed as following: I) Firstly, we normalized the  
558 confidence scores of each co-expression link of each initial network to the interval  
559 range from 0 to 1. II) Then, we assigned a confidence score to each association of the  
560 intra-method consensus gene networks by averaging the normalized confidence scores  
561 of all 6 initial networks. III) Finally, we defined the confidence score for each edge of  
562 final high confidence co-expression network by averaging the confidence scores of  
563 three intra-method consensus gene networks. Note that for the co-expression links not  
564 listed in a co-expression network were assigned a confidence score of 0.

## 565 **Performance evaluation**

566 As the information about gold standard *Oryza sativa* reference gene network is  
567 unavailable, we compiled as replacement a standard set of positive and negative links  
568 for the performance evaluation. The gold standard of positive functional links was  
569 obtained by capturing gene pairs that were contained in the same GO categories, the  
570 same pathways, interact with each other in protein-protein interaction network or  
571 linked in probabilistic functional gene network. To construct the gold standard of  
572 negative functional links, we firstly selected all the biologically unrelated GO pairs  
573 (semantic similarity score = 0) that have the number of genes greater than 5 and less  
574 than 50, coupling all possible gene pairs of each partnership in remainder GO terms as  
575 initial non-functional relationships. Subsequently, we established 10000 background  
576 distributions of functional similarity, by 10000 times randomly sampling of 1000 gene  
577 pairs and calculating the functional similarities. We selected a subset of gene pairs  
578 from the initial non-functional links as final non-functional links using the criterion  
579 that the functional similarity between gene pair that are smaller than the average of  
580 5th percentiles of these simulated background distributions. The semantic similarities  
581 between the GO terms were calculated using the R package of GOSim (Fröhlich et al.,

582 2007). Functional similarities between genes in terms of the GO space were calculated  
583 using the metric adopted from (Chabalier et al., 2007).

584 Since our gold standards included only a subset of true functional and non-functional  
585 link, we evaluated the predictive performance of our method for gene co-expression  
586 network inference using the fold enrichment measure. The fold of enrichment was  
587 calculated as a function of the confidence score cutoff ( $k$ ) in the edge list of the  
588 inferred network by the following formula:

$$589 \quad \frac{n_k}{m_k} \times \frac{M}{N} \quad (1),$$

590 where,  $n_k$  is the number of true positive or true negative functional links in the  $k$ th  
591 cutoff of the edge list;  $m_k$  is the number of edges of the inferred network in the  $k$ th  
592 cutoff;  $M$  denotes the number of true positive or true negative functional links in the  
593 gold standards and  $N$  represents the number of all possible interactions in the genome  
594 space. The network visualization was carried out using both Cytoscape (Cline et al.,  
595 2007) and BioLayout Express3D (Theocharidis et al., 2009).

596 The function enrichment of co-expression neighborhoods was calculated as the ratio  
597 of the relative occurrence in gene set of co-expression neighborhoods to the relative  
598 occurrence in genome using Fisher's exact test. The  $p$ -value was further adjusted by  
599 Benjamini-Hochberg correction for multiple hypotheses testing. The corrected  $p$ -value  
600 smaller than 0.05, was considered as enriched. To evaluate the predictive performance  
601 of our RNA-seq-based network for inferring gene function using the co-expression  
602 neighborhoods, we adopted the gene-centric evaluation, which were provided in the  
603 Critical Assessment of protein Function Annotation (CAFA) project (Tzafrir et al.,  
604 2003). **For this metric, the GO terms of each gene (gold and predicted) are propagated  
605 up the GO hierarchy to the root, obtaining a set of terms. In this process, for each  
606 scored GO term, we propagated its score (-log( $q$ -value) of Fisher's exact test) toward  
607 the root of the ontology such that each parent term received the highest score among  
608 its children.** The Sensitivity (Recall), 1-specificity, Precision and maximum F-measure  
609 (F-max) was calculated using the same method as in the CAFA project. The Receiver  
610 Operating Characteristics (ROC) curve was drawn by changing the threshold and  
611 plotting the Sensitivity versus the 1-specificity and then calculated the score of Area  
612 Under Curve. Similarly, we plotted the Precision-Recall (PR) curve by altering the  
613 threshold and plotting the Precision versus the Recall. Semantic similarity scores  
614 between the GO term pairs were calculated using the R package of GOSim.

## 615 **Analysis of circRNA genes**

616 The circular RNA (circRNA) genes were predicted using 618 novel rice RNA-seq  
617 samples downloaded from the NCBI Sequence Read Archive (accessed on February  
618 15, 2016) by CIRI software (Gao et al., 2015). We calculated the counts of junction  
619 reads of a circRNA as its relative expression abundance. Then, we integrated the  
620 aligned reads number of known rice genes using HTSeq-count program (v0.5.4) and  
621 expression values of circRNAs into a numeric expression matrix. We removed the  
622 circRNAs from the matrix if it was identified in less than 3 RNA-seq samples. Using  
623 the filtered matrix, we built three initial gene co-expression networks by WGCNA,  
624 GGM and BC3NET. Based on this, we selected the co-expression links contained in  
625 more than one network of the three initial networks to obtain the final co-expression  
626 network. Although only the numbers of junction reads were adopted to measure the  
627 expression abundances of circRNAs, this method is simple and effective for building  
628 co-expression network, given the reads were distributed uniformly along circRNA.

## 629 References

- 630 Abdullah Sayani, A., Bueno de Mesquita, J.M., and van de Vijver, M.J. (2006). Technology Insight: tuning into the  
631 genetic orchestra using microarrays-limitations of DNA microarrays in clinical practice. *Nat. Clin. Pract. Oncol.* 3,  
632 501-516.
- 633 Alipanahi, B., and Frey, B.J. (2013). Network cleanup. *Nat. Biotechnol.* 31, 714-715.
- 634 Anders, S., and Huber, W. (2010). Differential expression analysis for sequence count data. *Genome Biol.* 11,  
635 R106.
- 636 Anders, S., Pyl, P.T., and Huber, W. (2014). HTSeq-A Python framework to work with high-throughput sequencing  
637 data. *Bioinformatics* 31, 166-169.
- 638 Bergmann, S., Ihmels, J., and Barkai, N. (2003). Similarities and differences in genome-wide expression data of  
639 six organisms. *PLoS Biol.* 2, e9.
- 640 Bolger, A.M., Lohse, M., and Usadel, B. (2014). Trimmomatic: a flexible trimmer for Illumina sequence data.  
641 *Bioinformatics* 2114-2120.
- 642 Cao, P., Jung, K.H., Choi, D., Hwang, D., Zhu, J., and Ronald, P.C. (2012). The rice oligonucleotide array  
643 database: an atlas of rice gene expression. *Rice* 5, 1-9.
- 644 Chabalier, J., Mosser, J., and Burgun, A. (2007). A transversal approach to predict gene product networks from  
645 ontology-based similarity. *BMC Bioinf.* 8, 235.
- 646 Chen, L., Song, Y., Li, S., Zhang, L., Zou, C., and Yu, D. (2012). The role of WRKY transcription factors in plant  
647 abiotic stresses. *Biochim. Biophys. Acta, Gene Regul. Mech.* 1819, 120-128.
- 648 Cline, M.S., Smoot, M., Cerami, E., Kuchinsky, A., Landys, N., Workman, C., Christmas, R., Avila-Campilo, I.,  
649 Creech, M., and Gross, B. (2007). Integration of biological networks and gene expression data using Cytoscape.  
650 *Nat. Protoc.* 2, 2366-2382.
- 651 de Matos Simoes, R., and Emmert-Streib, F. (2012). Bagging statistical network inference from large-scale gene  
652 expression data. *PLoS One* 7, e33624.
- 653 De Smet, R., and Marchal, K. (2010). Advantages and limitations of current network inference methods. *Nat. Rev.*  
654 *Microbiol.* 8, 717-729.
- 655 Eulgem, T., and Somssich, I.E. (2007). Networks of WRKY transcription factors in defense signaling. *Curr. Opin.*  
656 *Plant Biol.* 10, 366-371.
- 657 Feizi, S., Marbach, D., Médard, M., and Kellis, M. (2013). Network deconvolution as a general method to  
658 distinguish direct dependencies in networks. *Nature biotechnology* 31, 726-733.
- 659 Friedman, J., Hastie, T., and Tibshirani, R. (2008). Sparse inverse covariance estimation with the graphical lasso.  
660 *Biostatistics* 9, 432-441.

- 661 Fröhlich, H., Speer, N., Poustka, A., and Beißbarth, T. (2007). GOSim—an R-package for computation of  
662 information theoretic GO similarities between terms and gene products. *BMC Bioinf.* 8, 166.
- 663 Gao, Y., Wang, J., and Zhao, F. (2015). CIRI: an efficient and unbiased algorithm for de novo circular RNA  
664 identification. *Genome Biol.* 16.
- 665 Gerstein, M.B., Rozowsky, J., Yan, K.K., Wang, D., Cheng, C., Brown, J.B., Davis, C.A., Hillier, L., Sisu, C., and  
666 Li, J.J. (2014). Comparative analysis of the transcriptome across distant species. *Nature* 512, 445-448.
- 667 Giorgi, F.M., Del Fabbro, C., and Licausi, F. (2013). Comparative study of RNA-seq-and Microarray-derived  
668 coexpression networks in *Arabidopsis thaliana*. *Bioinformatics* 29, 717-724.
- 669 Gu, H., Zhu, P., Jiao, Y., Meng, Y., and Chen, M. (2011). PRIN: a predicted rice interactome network. *BMC Bioinf.*  
670 12, 161.
- 671 Hase, T., Ghosh, S., Yamanaka, R., and Kitano, H. (2013). Harnessing diversity towards the reconstructing of large  
672 scale gene regulatory networks. *PLoS Comput. Biol.* 9, e1003361.
- 673 Hirochika, H., Sugimoto, K., Otsuki, Y., Tsugawa, H., and Kanda, M. (1996). Retrotransposons of rice involved in  
674 mutations induced by tissue culture. *Proc. Natl. Acad. Sci. U.S.A.* 93, 7783-7788.
- 675 Hong, S., Chen, X., Jin, L., and Xiong, M. (2013). Canonical correlation analysis for RNA-seq co-expression  
676 networks. *Nucleic Acids Res.* 41, e95-e95.
- 677 Huynh-Thu, V.A., Irrthum, A., Wehenkel, L., and Geurts, P. (2010). Inferring regulatory networks from expression  
678 data using tree-based methods. *PLoS One* 5, e12776.
- 679 Huynh Thu, V.A., Irrthum, A., Wehenkel, L., and Geurts, P. (2010). Inferring regulatory networks from expression  
680 data using tree-based methods. *PLoS One* 5, e12776.
- 681 Iancu, O.D., Kawane, S., Bottomly, D., Searles, R., Hitzemann, R., and McWeeney, S. (2012). Utilizing RNA-Seq  
682 data for de novo coexpression network inference. *Bioinformatics* 28, 1592-1597.
- 683 Jin, J., Zhang, H., Kong, L., Gao, G., and Luo, J. (2013). PlantTFDB 3.0: a portal for the functional and  
684 evolutionary study of plant transcription factors. *Nucleic Acids Res.*, gkt1016.
- 685 Jung, K.-H., Han, M.-J., Lee, D.-y., Lee, Y.-S., Schreiber, L., Franke, R., Faust, A., Yephremov, A., Saedler, H., and  
686 Kim, Y.-W. (2006). Wax-deficient *anther1* is involved in cuticle and wax production in rice anther walls and is  
687 required for pollen development. *Plant Cell* 18, 3015-3032.
- 688 Kitano, H. (2002a). Computational systems biology. *Nature* 420, 206-210.
- 689 Kitano, H. (2002b). Systems biology: a brief overview. *Science* 295, 1662-1664.
- 690 Langfelder, P., and Horvath, S. (2008). WGCNA: an R package for weighted correlation network analysis. *BMC*  
691 *Bioinf.* 9, 559.
- 692 Lee, I., Seo, Y.-S., Coltrane, D., Hwang, S., Oh, T., Marcotte, E.M., and Ronald, P.C. (2011). Genetic dissection of  
693 the biotic stress response using a genome-scale gene network for rice. *Proc. Natl. Acad. Sci. U.S.A.* 108,  
694 18548-18553.
- 695 Lertampaiporn, S., Thammarongtham, C., Nukoolkit, C., Kaewkamnerdpong, B., and Ruengjitchachawalya, M.  
696 (2013). Heterogeneous ensemble approach with discriminative features and modified-SMOTEbagging for  
697 pre-miRNA classification. *Nucleic Acids Res.* 41, e21-e21.
- 698 Liu, J., Kang, S., Tang, C., Ellis, L.B., and Li, T. (2007). Meta-prediction of protein subcellular localization with  
699 reduced voting. *Nucleic Acids Res.* 35, e96.
- 700 Ma, S., Shah, S., Bohnert, H.J., Snyder, M., and Dinesh-Kumar, S.P. (2013). Incorporating motif analysis into gene  
701 co-expression networks reveals novel modular expression pattern and new signaling pathways. *PLoS Genet.* 9,  
702 e1003840.
- 703 Madeira, S.C., and Oliveira, A.L. (2004). Biclustering algorithms for biological data analysis: a survey.  
704 *IEEE/ACM Trans. Comput. Biol. Bioinf.* 1, 24-45.
- 705 Marbach, D., Costello, J.C., Küffner, R., Vega, N.M., Prill, R.J., Camacho, D.M., Allison, K.R., Kellis, M., Collins,  
706 J.J., and Stolovitzky, G. (2012). Wisdom of crowds for robust gene network inference. *Nat. Methods* 9, 796-804.
- 707 Memczak, S., Jens, M., Elefsinioti, A., Torti, F., Krueger, J., Rybak, A., Maier, L., Mackowiak, S.D., Gregersen,  
708 L.H., and Munschauer, M. (2013). Circular RNAs are a large class of animal RNAs with regulatory potency.  
709 *Nature* 495, 333-338.
- 710 Miao, Y., and Zentgraf, U. (2007). The antagonist function of *Arabidopsis* WRKY53 and ESR/ESP in leaf  
711 senescence is modulated by the jasmonic and salicylic acid equilibrium. *Plant Cell* 19, 819-830.
- 712 Mitra, K., Carvunis, A.R., Ramesh, S.K., and Ideker, T. (2013). Integrative approaches for finding modular  
713 structure in biological networks. *Nat. Rev. Genet.* 14, 719-732.



- 714 Mutwil, M., Klie, S., Tohge, T., Giorgi, F.M., Wilkins, O., Campbell, M.M., Fernie, A.R., Usadel, B., Nikoloski,  
715 Z., and Persson, S. (2011). PlaNet: combined sequence and expression comparisons across plant networks derived  
716 from seven species. *Plant Cell* 23, 895-910.
- 717 Nagasawa, N., Miyoshi, M., Sano, Y., Satoh, H., Hirano, H., Sakai, H., and Nagato, Y. (2003). SUPERWOMAN1  
718 and DROOPING LEAF genes control floral organ identity in rice. *Development* 130, 705-718.
- 719 Obayashi, T., Hayashi, S., Saeki, M., Ohta, H., and Kinoshita, K. (2009). ATTED-II provides coexpressed gene  
720 networks for Arabidopsis. *Nucleic Acids Res.* 37, D987-D991.
- 721 Qin, J., Hu, Y., Xu, F., Yalamanchili, H.K., and Wang, J. (2014). Inferring gene regulatory networks by integrating  
722 ChIP-seq/chip and transcriptome data via LASSO-type regularization methods. *Methods* 67, 294-303.
- 723 Ranzani, V., Rossetti, G., Panzeri, I., Arrigoni, A., Bonnal, R.J., Curti, S., Gruarin, P., Provasi, E., Sugliano, E., and  
724 Marconi, M. (2015). The long intergenic noncoding RNA landscape of human lymphocytes highlights the  
725 regulation of T cell differentiation by linc-MAF-4. *Nat. Immunol.* 16, 318-325.
- 726 Robinson, M.D., McCarthy, D.J., and Smyth, G.K. (2010). edgeR: a Bioconductor package for differential  
727 expression analysis of digital gene expression data. *Bioinformatics* 26, 139-140.
- 728 Rodriguez, R.E., Mecchia, M.A., Debernardi, J.M., Schommer, C., Weigel, D., and Palatnik, J.F. (2010). Control of  
729 cell proliferation in Arabidopsis thaliana by microRNA miR396. *Development* 137, 103-112.
- 730 Rushton, P.J., Somssich, I.E., Ringler, P., and Shen, Q.J. (2010). WRKY transcription factors. *Trends Plant Sci.* 15,  
731 247-258.
- 732 Schäfer, J., Opgen-Rhein, R., and Strimmer, K. (2001). Reverse engineering genetic networks using the GeneNet  
733 package. *J. Am. Stat. Assoc.* 96, 1151-1160.
- 734 Shi, J., Tan, H., Yu, X.-H., Liu, Y., Liang, W., Ranathunge, K., Franke, R.B., Schreiber, L., Wang, Y., and Kai, G.  
735 (2011). Defective pollen wall is required for anther and microspore development in rice and encodes a fatty acyl  
736 carrier protein reductase. *Plant Cell* 23, 2225-2246.
- 737 Siegfried, K.R., Eshed, Y., Baum, S.F., Otsuga, D., Drews, G.N., and Bowman, J.L. (1999). Members of the  
738 YABBY gene family specify abaxial cell fate in Arabidopsis. *Development* 126, 4117-4128.
- 739 Stief, A., Altmann, S., Hoffmann, K., Pant, B.D., Scheible, W.-R., and Bäurle, I. (2014). Arabidopsis miR156  
740 regulates tolerance to recurring environmental stress through SPL transcription factors. *Plant Cell* 26, 1792-1807.
- 741 Stuart, J.M., Segal, E., Koller, D., and Kim, S.K. (2003). A gene-coexpression network for global discovery of  
742 conserved genetic modules. *Science* 302, 249-255.
- 743 Theocharidis, A., Van Dongen, S., Enright, A.J., and Freeman, T.C. (2009). Network visualization and analysis of  
744 gene expression data using BioLayout Express3D. *Nature protocols* 4, 1535-1550.
- 745 Trapnell, C., Pachter, L., and Salzberg, S.L. (2009). TopHat: discovering splice junctions with RNA-Seq.  
746 *Bioinformatics* 25, 1105-1111.
- 747 Trapnell, C., Roberts, A., Goff, L., Pertea, G., Kim, D., Kelley, D.R., Pimentel, H., Salzberg, S.L., Rinn, J.L., and  
748 Pachter, L. (2012). Differential gene and transcript expression analysis of RNA-seq experiments with TopHat and  
749 Cufflinks. *Nat. Protoc.* 7, 562-578.
- 750 Tzafirir, I., Dickerman, A., Brazhnik, O., Nguyen, Q., McElver, J., Frye, C., Patton, D., and Meinke, D. (2003). The  
751 Arabidopsis seedgenes project. *Nucleic Acids Res.* 31, 90-93.
- 752 Usadel, B., Obayashi, T., Mutwil, M., Giorgi, F.M., Bassel, G.W., Tanimoto, M., Chow, A., Steinhäuser, D.,  
753 Persson, S., and Provart, N.J. (2009). Co-expression tools for plant biology: opportunities for hypothesis  
754 generation and caveats. *Plant, Cell & Environment* 32, 1633-1651.
- 755 Vandepoele, K., Quimbaya, M., Casneuf, T., De Veylder, L., and Van de Peer, Y. (2009). Unraveling transcriptional  
756 control in Arabidopsis using cis-regulatory elements and coexpression networks. *Plant Physiol.* 150, 535-546.
- 757 Vandepoele, K., Vlieghe, K., Florquin, K., Hennig, L., Beemster, G.T., Gruissem, W., Van de Peer, Y., Inzé, D., and  
758 De Veylder, L. (2005). Genome-wide identification of potential plant E2F target genes. *Plant Physiol.* 139,  
759 316-328.
- 760 Vidal, M., Cusick, M.E., and Barabasi, A.-L. (2011). Interactome networks and human disease. *Cell* 144, 986-998.
- 761 Wu, G., Park, M.Y., Conway, S.R., Wang, J.-W., Weigel, D., and Poethig, R.S. (2009). The sequential action of  
762 miR156 and miR172 regulates developmental timing in Arabidopsis. *Cell* 138, 750-759.
- 763 Xie, Z., Zhang, Z.L., Hanzlik, S., Cook, E., and Shen, Q.J. (2007). Salicylic acid inhibits gibberellin-induced  
764 alpha-amylase expression and seed germination via a pathway involving an abscisic-acid-inducible WRKY gene.  
765 *Plant Mol. Biol.* 64, 293-303.
- 766 Yalamanchili, H.K., Li, Z., Wang, P., Wong, M.P., Yao, J., and Wang, J. (2014). SpliceNet: recovering splicing  
767 isoform-specific differential gene networks from RNA-Seq data of normal and diseased samples. *Nucleic Acids*



- 768 Res., gku577.
- 769 Yang, P., Hwa Yang, Y., B Zhou, B., and Y Zomaya, A. (2010). A review of ensemble methods in bioinformatics.  
770 Curr. Bioinform. 5, 296-308.
- 771 Ye, C.Y., Chen, L., Liu, C., Zhu, Q.H., and Fan, L. (2015). Widespread noncoding circular RNAs in plants. New  
772 Phytol. 208, 88-95.
- 773 Yi, X., Du, Z., and Su, Z. (2013). PlantGSEA: a gene set enrichment analysis toolkit for plant community. Nucleic  
774 Acids Res. 41, W98-W103.
- 775 Yonemaru, J.I., Yamamoto, T., Fukuoka, S., Uga, Y., Hori, K., and Yano, M. (2010). Q-TARO: QTL annotation rice  
776 online database. Rice 3, 194-203.
- 777 Zhang, Y.C., Liao, J.Y., Li, Z.Y., Yu, Y., Zhang, J.P., Li, Q.F., Qu, L.H., Shu, W.S., and Chen, Y.Q. (2014).  
778 Genome-wide screening and functional analysis identify a large number of long noncoding RNAs involved in the  
779 sexual reproduction of rice. Genome Biol. 15, 512.
- 780 Zhang, Z., Yu, J., Li, D., Zhang, Z., Liu, F., Zhou, X., Wang, T., Ling, Y., and Su, Z. (2010). PMRD: plant  
781 microRNA database. Nucleic Acids Res. 38, D806-D813.
- 782

## 783 Figure Legends

784 **Fig.1** Enrichment folds of different algorithms for co-expression network inference. A) Comparing to GGM with  
785 positive links. B) Comparing to WGCNA with positive links. C) Comparing with BC3NET with positive links. D)  
786 Comparing with GGM with negative links. E) Comparing with WGCNA with negative links. F) Comparing with  
787 BC3NET with negative links. In the legends, the RAW, FPKM, UQ, TMM, RLE and VST represent the networks  
788 obtained by the single RNA-seq dataset; INT indicates intra-method consensus networks established by integrating  
789 the predictions of different RNA-seq datasets, EBM denotes high-quality gene co-expression network obtained by  
790 integrating all intra-method consensus networks

791 **Fig.2** Performance evaluation of our network for predicting gene function. A) Receiver Operating Characteristics  
792 (ROC) curve. B) Precision-Recall (PR) curve. In the legends, Not-weighted indicates the evaluation parameters  
793 were calculated by the standard method of CAFA project; Weighted indicates the evaluation parameters were  
794 calculated by the weighted method of CAFA project

795 **Fig.3** Subnetworks derived from the gene-guide approach. The subnetworks include all other nodes within two  
796 layer connections from guide genes. A) *OsMADS16* involved in flower development; B) *OsCESA4* involved in cell  
797 wall biosynthesis. Within each subnetwork, red nodes represent the experimentally verified genes related to  
798 corresponding biological functions. Pink nodes indicate the genes whose *Arabidopsis* homologs are experimentally  
799 verified relating to the corresponding biological processes. Blue nodes represent potential function-related genes,  
800 and the gray nodes denote that the genes with unknown functions or annotated with irrelevant functions. The size  
801 of node is proportional to the number of connected genes

802 **Fig.4** Subnetworks derived from the known *cis*-regulatory motif-guide approach. A) WTTSSCSS combined with  
803 the E2F transcription factors involved in cell cycle. B) TTGACY combined with the WRKY transcription factors  
804 involved in stress response. Within each subnetwork, red nodes represent the experimentally verified genes related  
805 to corresponding biological functions. Pink nodes indicate the genes whose *Arabidopsis thaliana* homologs are  
806 experimentally verified to associate with the corresponding biological functions. Blue nodes denote potential

807 function-related genes. Gray nodes indicate that the genes with unknown functions or annotated with irrelevant  
808 functions. The size of node is proportional to the number of connected genes

809 **Fig.5** Co-expression subnetwork derived from guide-gene approach for *XLOC\_057324* associated with panicle  
810 development and fertility. Within the subnetwork, red nodes represent the experimentally verified genes related to  
811 corresponding biological functions; chrysoidine nodes represent transcription factors; pink nodes indicate the  
812 genes whose *Arabidopsis thaliana* homologues are experimentally verified to related to corresponding biological  
813 functions; blue nodes represent that the genes are potential function-related, and the gray nodes indicate that the  
814 genes are function unknown or annotated with unrelated functions

815 **Fig.6** Flowchart of high-quality RNA-seq-based gene co-expression network inference

## 816 **Acknowledgements**

817 This work is financially supported by The Strategic Priority Research Program of the  
818 Chinese Academy of Sciences (Grant No. XDA08020302). The funders had no role  
819 in study design, data collection and analysis, decision to publish, or preparation of the  
820 manuscript.

## 821 **Author Contributions**

822 H.Y. conceived the original screening and research plans; H.Y. and C.Z.L conceived  
823 the project; C.Z.L. and H.Y. supervised the experiments; H.Y. performed most of the  
824 experiments, analyzed the data and wrote the paper; B.K.J analyzed the phenotype  
825 data and revised the paper.

## 826 **Additional Information**

827 **Competing financial interests:** The authors declare no competing financial interests.

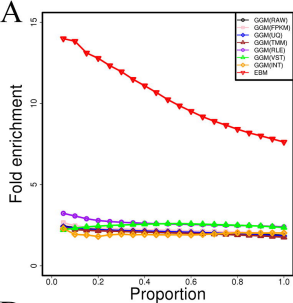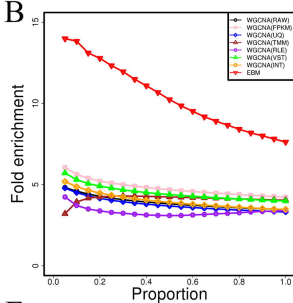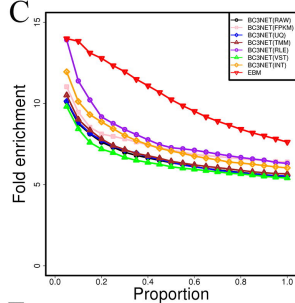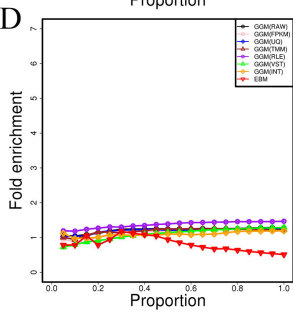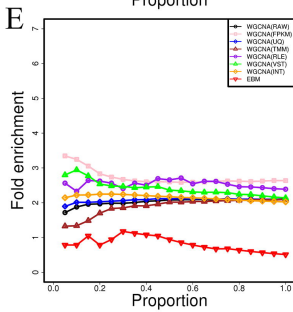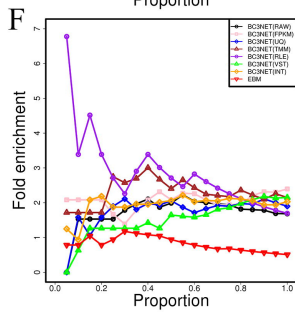

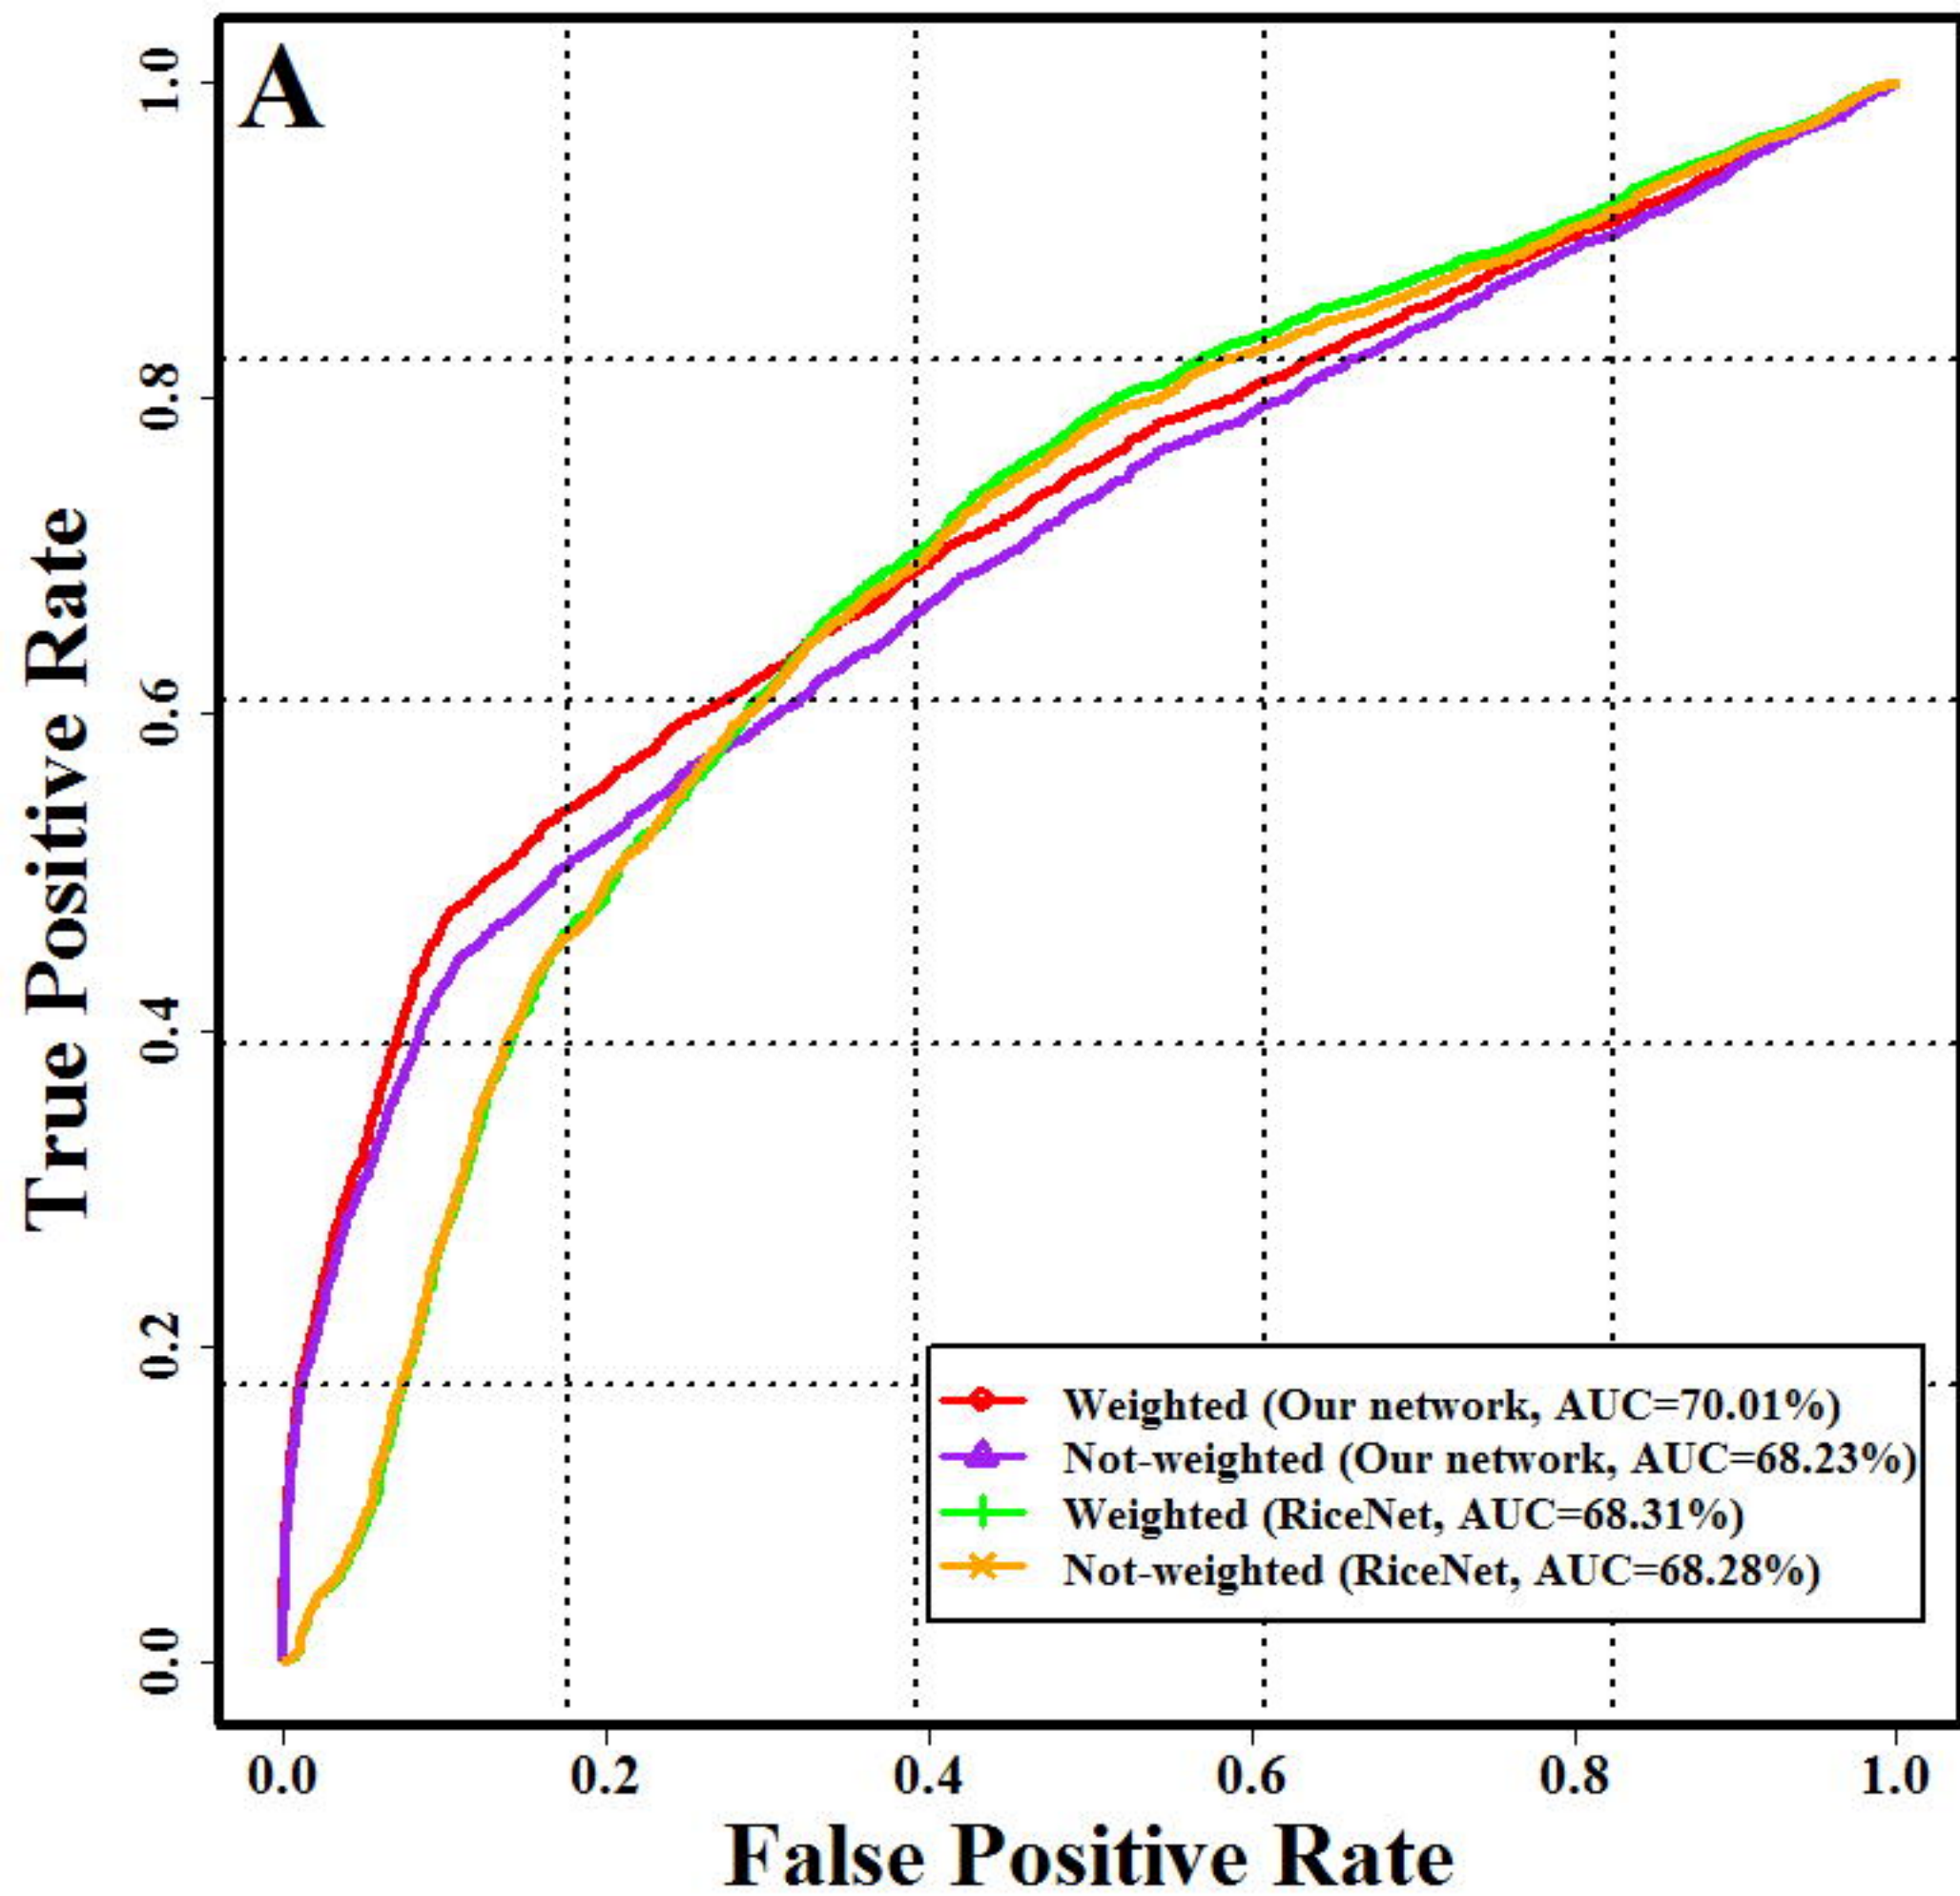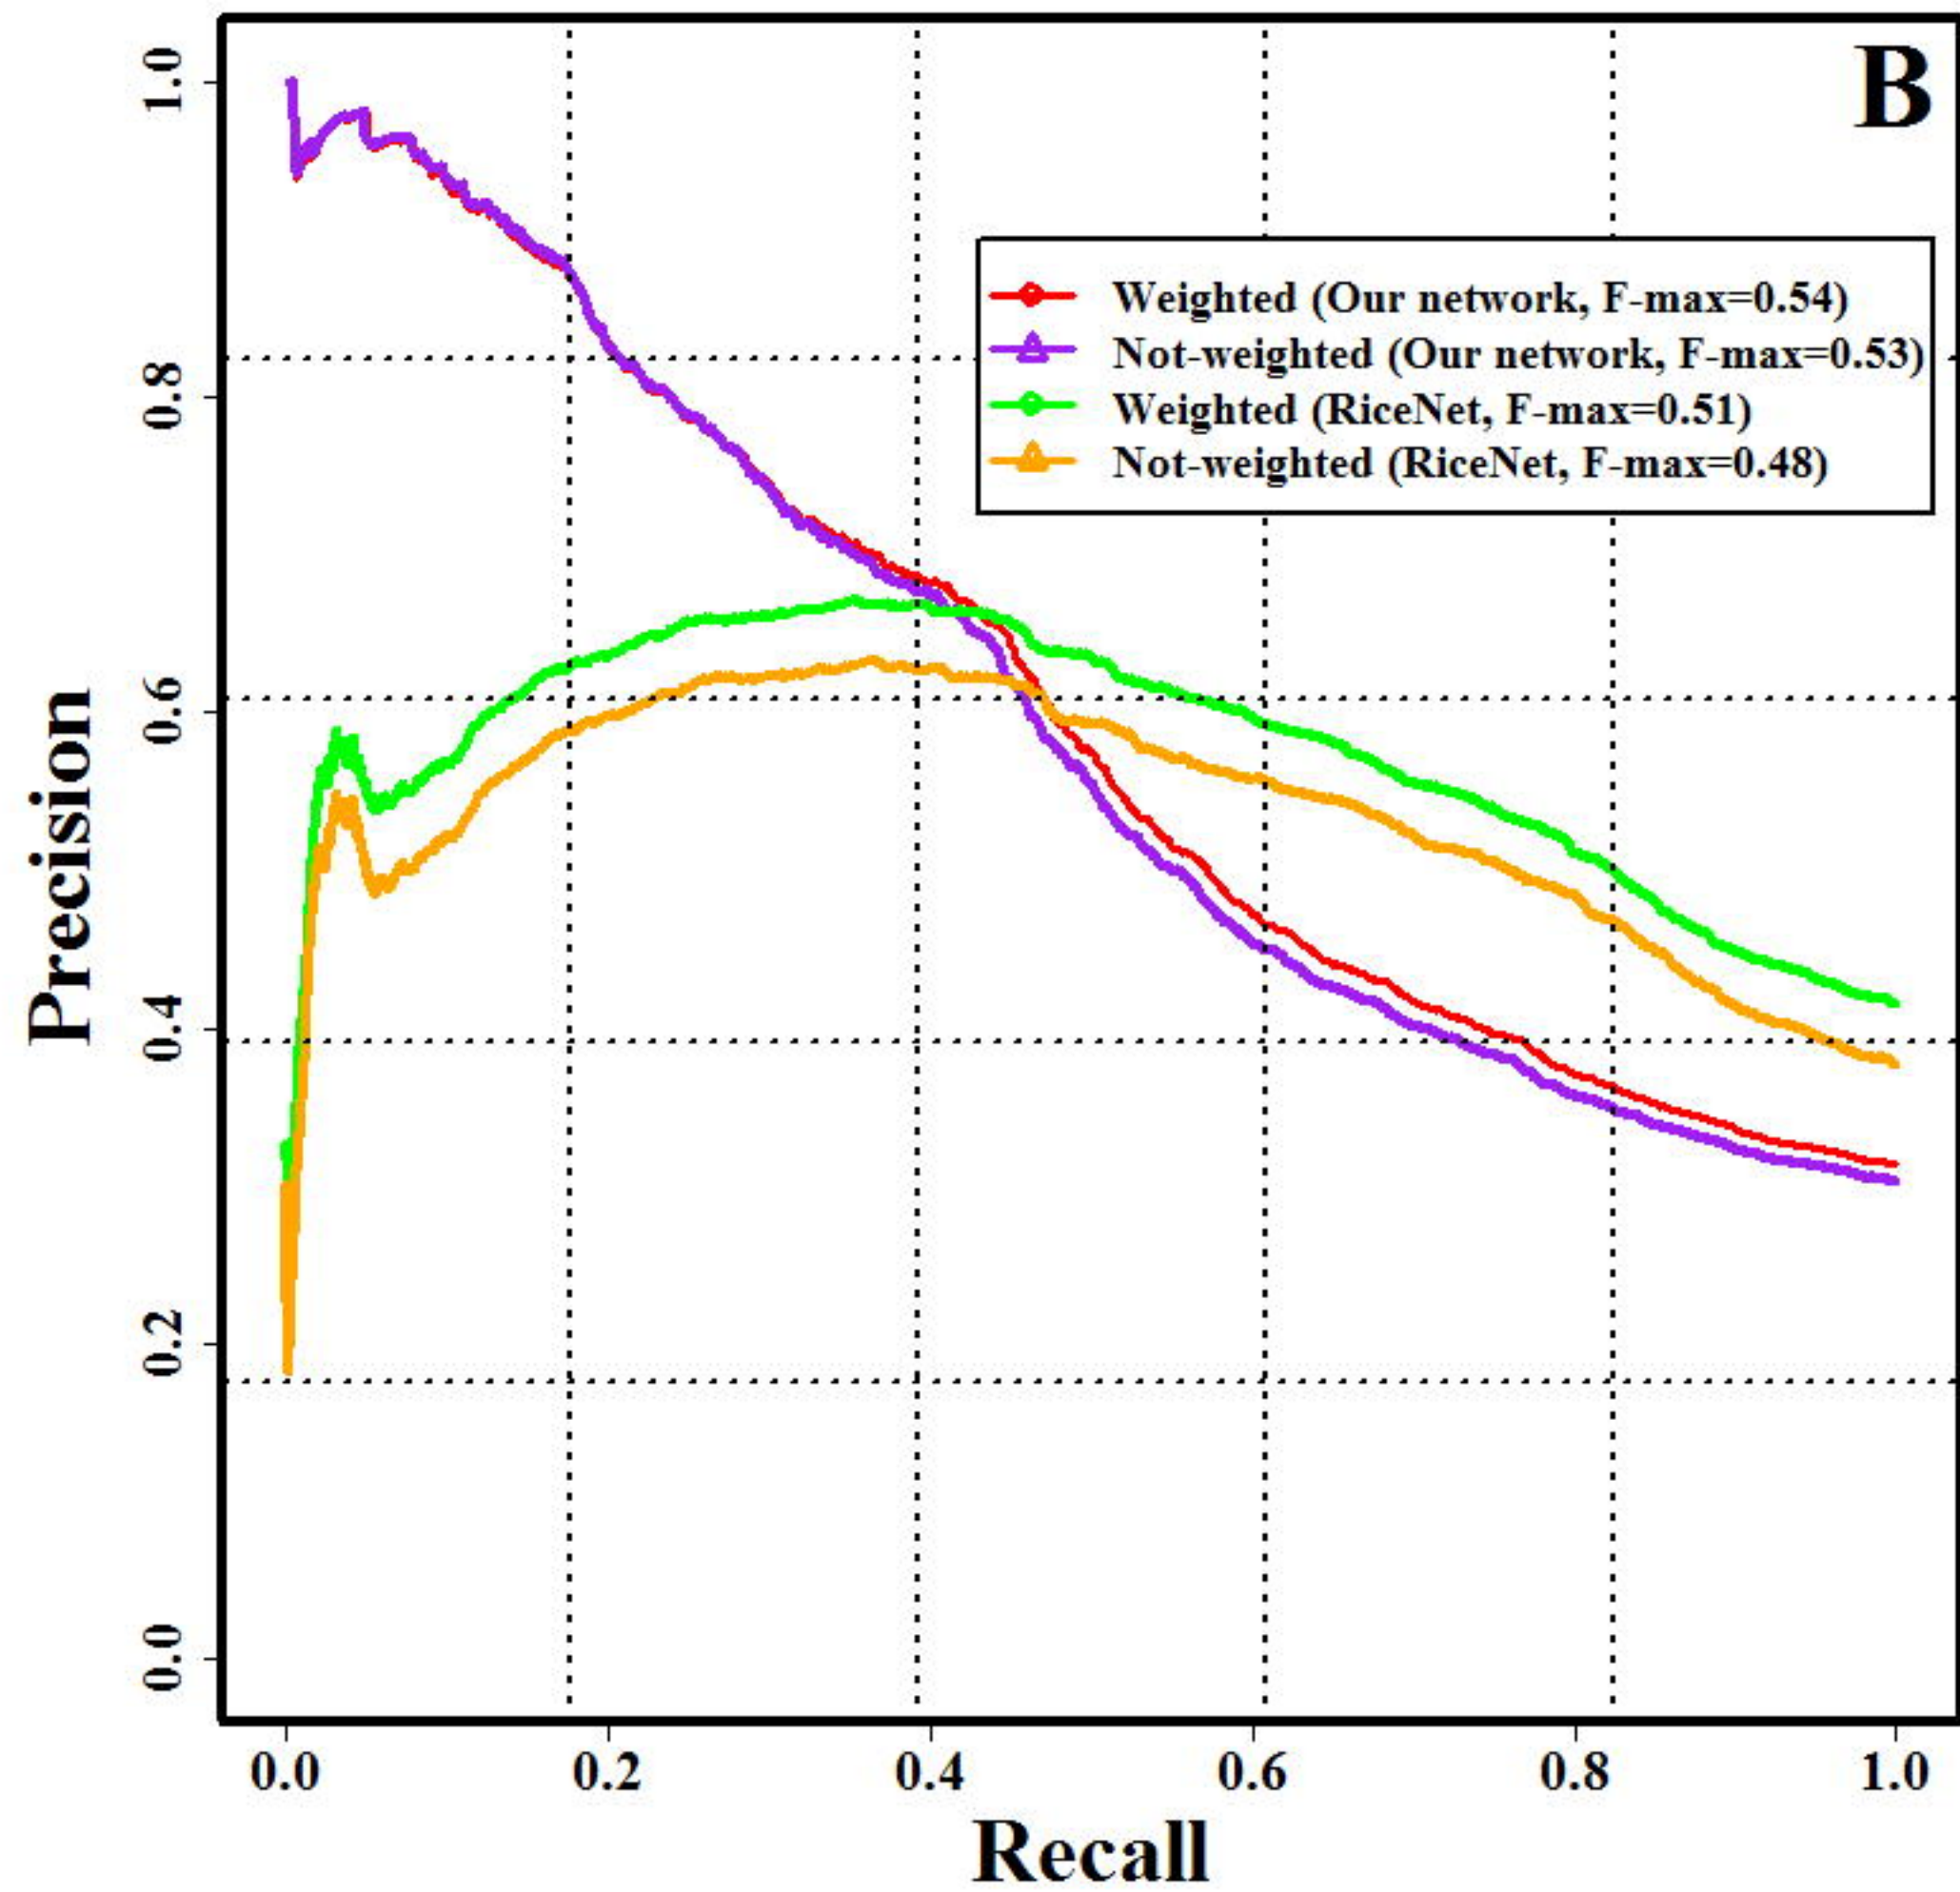



A

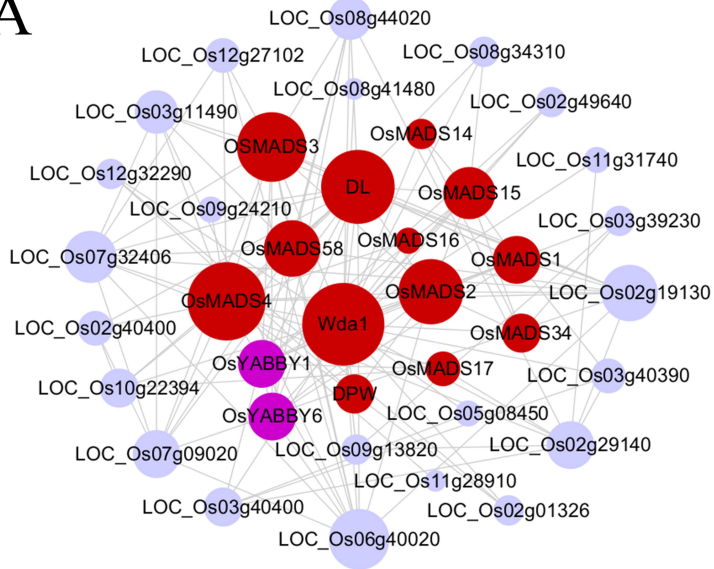

B

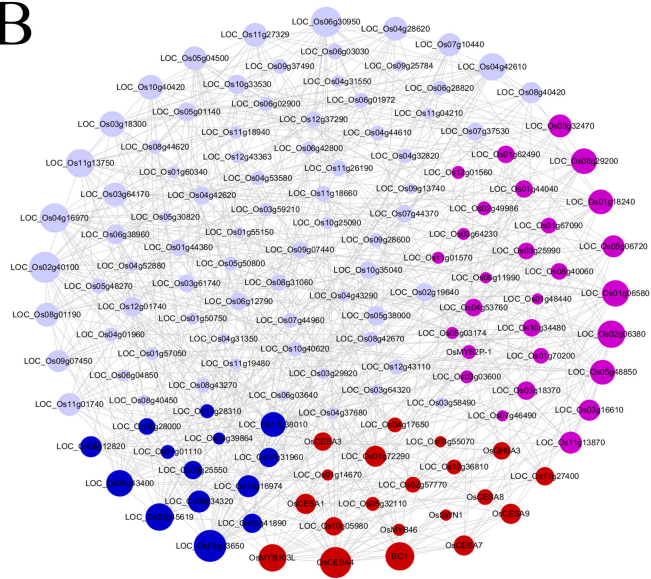







Large-scale RNA-seq Samples

Reads Filtering and  
Mapping

Outlier Detection,  
Filtering and Data  
Normalization

6 RNA-seq Expression Datasets

WGCNA, Hard  
Threshold  
Determination Using  
Permutation Test

BC3NET

GGM, Hard Threshold  
Determination Using  
Permutation Test

Candidate Gene Co-expression Networks

Ensemble-based  
Network Construction

High-quality Gene Co-expression Network
